# Supplementary material for: Disturbance legacies have a stronger effect on future carbon exchange than climate in a temperate forest landscape
Source: Copernicus journal article supplement (doi:10.5194/bg-2018-145), 2018-04-03
Supplement: Supplementary file 1 [file bg-2018-145-supplement.pdf]

1 **Supplement of Dominik Thom, Werner Rammer, Rita Garstenauer, Rupert**

2 **Seidl**

3 Email: [dominik.thom@uvm.edu](mailto:dominik.thom@uvm.edu)

4

5 **S1: Historical data**

6 *Archival sources*

7 All archival sources were obtained from the archives of the Austrian Federal Forests  
8 (Österreichische Bundesforste), located in Purkersdorf, Austria. The material consists of maps,  
9 quantitative documentations (e.g., tables of growing stock per species and stand), and verbal  
10 descriptions of vegetation state, natural disturbances, and forest management. We compiled  
11 these sources by means of photographic documentation and subsequent transcription.

12

13 The full list of sources includes:

14 Revisionsoperat des K.K. Wirtschaftsbezirkes Reichraming 1903-1912

15 Revisionsoperat für den K.K. Wirtschaftsbezirk Reichraming 1913-1922

16 Wirtschafts-Buch für den k.k. Wirtschaftsbezirk Reichraming 1903-1926

17 Reichraming 1938-1947 [*data for the period 1927-1937*]

18 Gedenkbuch 1950-1959 FV. Reichraming

19 Gedenkbuch 1960-1969 FV. Reichraming

20 Gedenkbuch Reichraming 1970-1983

- 21 Revisions-Operat für den K.K. Wirtschaftsbezirk Weyer (Steiermärkischer Religionsfonds)
- 22 1902-1911
- 23 Revisions-Operat für den K.K. Wirtschaftsbezirk Weyer (Steirm. Fondsforst) 1912-1921
- 24 Weyer 1928-1937
- 25 Altenmarkt 1938-1947
- 26 WB Weyer 1953-62, I
- 27 Wirtschaftsbuch begonnen mit dem Jahr 1902 (Weyer, Oberösterreichisches Religionsfonds)
- 28 Waldbesitz Ebenforst der Herrschaft Steyr. Flächentabelle, Bestandsbeschreibung,
- 29 Altersklassen Verzeichnis nach dem Stande 1898
- 30 R. Klöpferscher Waldbesitz Reichraming, Revier Ebenforst. Stand 1. April 1947 [Map]
- 31 R. Klöpfer'scher Waldbesitz Reichraming, Revier Weissenbach, Stand 1. April 1947 [Map]
- 32 Nikolaus'scher Waldbesitz Reichraming, Revier Weissenbach, Stand 1. I. 1964 [Map]
- 33 Nikolaus'scher Waldbesitz Reichraming, Revier Ebenforst. Stand 1. I. 1947 [Map]
- 34 Waldwirtschaftsplan 1974-1983 Forstwirtschaftsbezirk Karl Heinrich NICOLAUS, 4462
- 35 Reichraming.
- 36 Betriebseinrichtungs-Elabort vom Reviere Zeitschenberg O.Ö. 1907
- 37 W.B. Rosenau 1950-1959
- 38
- 39 From these sources, two types of data were extracted: First, spatially explicit data at the level
- 40 of stands for the entire study landscape (see Fig. S2). These data represent the best available

41 historical information, and were available for certain points in time (or multi-year inventory  
42 periods). Specifically, spatially explicit inventories on the forest state were available for the  
43 periods 1902/03, 1912/13, and 1926/27 (see Fig. S3). In addition, stand-level data on natural  
44 disturbances and anthropogenic disturbances (harvesting) were available for the period 1902 –  
45 1927. Second, time series of harvest levels were available for the entire study landscape with  
46 annual resolution (source materials for the forest districts Weyer and Reichraming). These data  
47 were used to analyze the annual variation in harvest levels. They were furthermore analyzed for  
48 major disturbance events. In addition we screened the written protocols and examined  
49 meteorological data with a particular focus on detecting major disturbance events outside the  
50 two well-documented disturbance episodes 1917-1923 and 2007-2013. These analyses showed  
51 that no notable disturbance events occurred between the two major periods analyzed explicitly  
52 here.

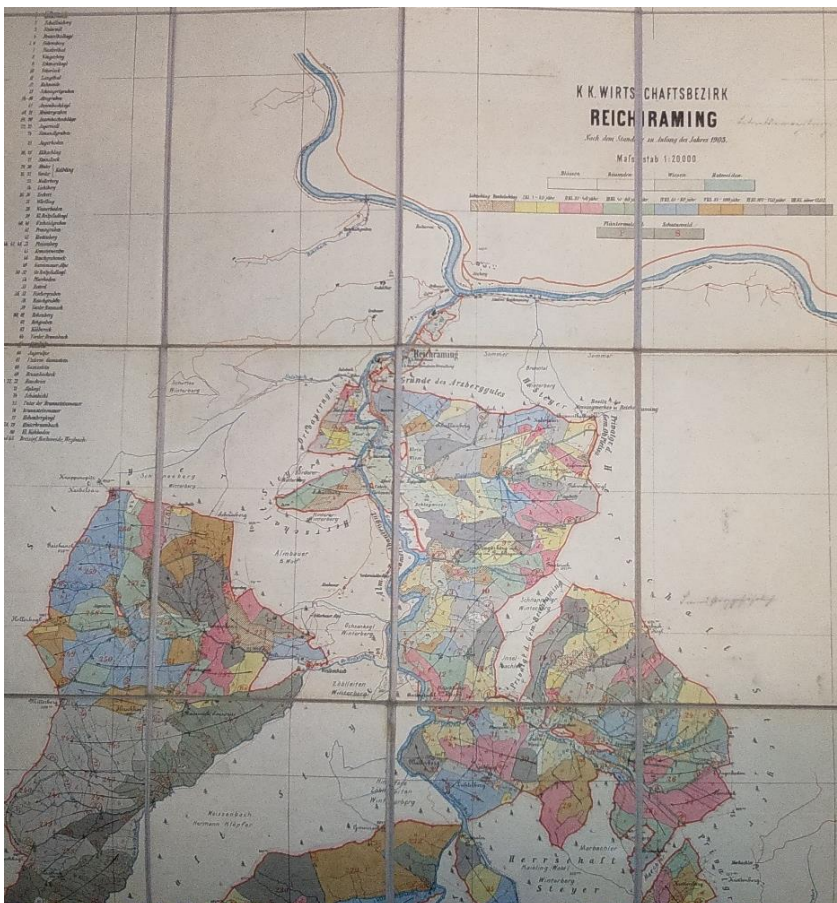

53

54 Fig. S2: Example for a map extracted from archival sources, showing a segment of the forest  
 55 district Reichraming in 1903. The colors denote different age classes of forest stands.

56

Wirtschaftsbezirk Reichraming  
 Verzeichnis  
 des Bestandes der Holzarten im J. 1903. nach den Messungen (Einmessung) der...

| Standort | Waldart | Stammzahl |                | Bestandesgrundfläche |                | Holzvorrat |    | Bemerkung |
|----------|---------|-----------|----------------|----------------------|----------------|------------|----|-----------|
|          |         | Stück     | m <sup>2</sup> | Stück                | m <sup>3</sup> |            |    |           |
| 2        | c       | 540       | 110            | 42 23                |                |            |    |           |
| 4        | f       | 623       | 115            | 42 26                | 655            | 155 27 23  | 87 | 57 25 59  |
| 5        | a       | 1         | 90             | 42 20                | 57             | 57 26 15   | 87 | 57 25 59  |
| 5        | g       | 101       | 120            | 42 27                |                | 46 99      |    | 11 575    |
| 8        | b       | 74        | 120            | 42 25                | 201            | 201 15 09  | 72 | 72 29 26  |

57

58 Fig. S3: Example for an inventory table extracted from archival sources, showing stem number  
 59 (Stammzahl), basal area (Bestandesgrundfläche) and growing stock (Holzvorrat) per tree  
 60 species and stand.

61

62 **Identification of spatial units**

63 The delineation of forest stands started in the 1880s in our study area. In most cases, the  
 64 boundaries of these stands were found to be still valid today, however, minor changes have  
 65 been made over time (these are well-documented in the forest inventory sources). The spatial

66 identification of stand units was done case by case, comparing toponyms, stand shapes and  
67 sizes between historical and recent maps. This approach allowed us to link data spatially  
68 between different time periods, and to evaluate the congruence of spatial units between  
69 periods. Minor reduction in the size of stand polygons was frequently detected, and was  
70 usually attributable to the construction of roads and other infrastructure. In some cases,  
71 changes in the stand configuration were made (particularly in remote high-elevation areas of  
72 the landscape), which were accounted for by subdividing the respective polygons.

73

#### 74 *Data gaps*

75 Forests that were under federal ownership throughout the study period were found to be best  
76 documented. Two parts in the northern reaches of the landscape were under different  
77 ownership, but were sufficiently well documented to retain them in our study. These areas  
78 have previously been part of the domain Lamberg, and cover about 1/6 of the total landscape.  
79 Nonetheless, a number of data gaps had to be filled to achieve a complete and seamless  
80 reconstruction of the landscape history.

81 To fill data gaps regarding the temporal variation in natural and anthropogenic disturbances  
82 we assumed equivalence in relative changes, i.e., based on disturbance percentages in a given  
83 year for a certain area, we assumed an equivalent change also for areas with missing data. For  
84 instance, after 1923 time series on annual harvest and natural disturbance were only available  
85 for the forest districts of Reichraming and Weyer (the two main historic forest districts in our  
86 study area, covering in total 4492.4 ha). Moreover, Reichraming is lacking data for the years  
87 1938 to 1946, hence the temporal variation of disturbances was only based on the data for  
88 Weyer during this period. The data for Weyer terminates in 1952, i.e., only data from the  
89 district Reichraming was available for the following years. Where the time series of the two

90 forest districts overlapped, we found similar trends in Reichraming and Weyer, supporting our  
91 assumption of equivalence between the two areas.

92

## 93 S4: Legacy spin-up

### 94 *Legacy spin-up procedure*

95 Management and disturbance history have a long-lasting influence on forest stands, and are  
96 important determinants of the state of a forest at any given point in time. Yet, detailed  
97 information about forest history for initializing simulation models is oftentimes not available  
98 (e.g., the spatial patterns of past disturbances). Uncertainties in initialization can have  
99 substantial influence on the simulated trajectories (Temperli et al. 2013).

100 Using models enables the simulation of past forest development, including past management  
101 and disturbances, in the form of a spin-up run. Models can thus help to create realistic and  
102 quantitative past and current states of forests. In a conventional spin-up, the model is run for an  
103 extended period of time under past forcing, and a snapshot of the simulated state is taken— after  
104 reaching a predefined stopping criterion (e.g., elapsed time, variation in certain C pools) – as  
105 the starting point for scenario analyses (Thornton and Rosenbloom 2005). This results in  
106 meaningful estimates regarding important ecosystem properties, and a system state that is  
107 consistent with the internal model logic. However, thus derived ecosystem states often do not  
108 correspond well with the information available from past and current observations. For instance,  
109 a stand that was recently disturbed in reality could be initialized in a late-seral stage from a  
110 spin-up. This lack of structural realism strongly limits the utility of a traditional spin-up  
111 approach for initializing models for future projections. Factors such as the spatial distribution  
112 of age cohorts on the landscape have important implications for the future ecosystem dynamics,  
113 e.g., in the context of future susceptibility to disturbances. Therefore, we have developed a new  
114 spin-up approach, termed legacy spin-up, aiming to assimilate available data on the ecosystem  
115 state at a given point in time into the spin-up procedure, in order to improve the correspondence  
116 of the model state derived from spin-up with the observed state of the system.



117 Our approach differs from conventional model spin-up by considering the available information  
118 of the state of any given stand on the landscape for a reference point in time (Fig. S5). As with  
119 a conventional spin-up, the legacy spin-up starts by running the model over an extended period  
120 of time. This results in a large number of possible states that a given stand on the landscape can  
121 be in, given the prevailing climate and soil conditions as well as the past management and  
122 disturbance regime. From this state space of each stand, the legacy spin-up procedure selects  
123 the state that corresponds most closely to the reference values available for each stand (e.g.,  
124 observed values from forest inventories, remote sensing, or archival data). In other words, the  
125 legacy spin-up does not simply use the vegetation state of the last year of the spin-up run for all  
126 stands as initial condition for scenario analysis, but for each stand identifies the specific year of  
127 the spin-up run in which the state of the vegetation corresponds most closely to the reference  
128 conditions.

129 To improve the correspondence between the simulated state space for each stand and the  
130 reference conditions we harness the adaptive capacity of the agent-based forest management  
131 module (ABE) integrated into iLand (Rammer and Seidl 2015). As historic management is not  
132 known, we start the spin-up run using generic historic management. The emerging state space  
133 in the spin-up simulation is monitored and compared to the reference values, and ABE adapts  
134 stand management iteratively to decrease the deviation between the simulated state space and  
135 the reference conditions.

136 For each stand polygon an a priori stand treatment program (STP) is created based on available  
137 information on past management regimes and the current state of the system (i.e., the reference  
138 state). Such a typical STP for managed forests in Central Europe includes planting, several  
139 thinnings and a final cut (Fig. S5). For instance, the initial planting could plant trees according  
140 to the target species shares (A in Fig. S5). During the simulation the defined management steps  
141 are executed (e.g., thinnings, B, final cut C). Periodically, the state of the forest is evaluated



142 against the available reference data. A basic evaluation compares, for instance, the growing  
143 stock and species shares emerging from the simulation with the respective reference state, and  
144 calculates a similarity score (e.g., Bray-Curtis index). When the deviation between the emerging  
145 state space from the simulations and the reference state are not satisfactorily, the STP for the  
146 next rotation can be altered. In the example in Fig. S5, the simulated share of spruce was lower  
147 than the spruce share in the reference state, indicating that spruce was likely favored by past  
148 management, either by planting spruce (C) or by favoring spruce via selective thinnings. This  
149 information is incorporated in the spin-up run, which henceforth uses a modified STP for the  
150 given stand and the next rotation (D). This process of iterative adaptation of historic  
151 management to increase the similarity between the emerging system state and the reference  
152 state is repeated several times. Whenever the simulated forest state has a higher similarity to  
153 the reference state than in previous iterations, the state of the stand is stored within a snapshot  
154 database (including all the relevant ecosystem information), potentially overwriting previously  
155 saved states with lower similarity. This process is executed for all stands of the landscape in  
156 parallel. The final step of the process (after, e.g., 1000 years of spin-up) is for each stand to load  
157 the saved forest state from the database (i.e., the state that had the highest similarity score  
158 relative to the reference state throughout the iterative spin-up run), and to create a single  
159 landscape “composite” from all of these saved stand states. This composite is subsequently used  
160 as the initial state of the landscape for scenario simulations. The spin-up procedure also creates  
161 detailed log files which can be further analyzed (e.g., regarding the deviation of the initialized  
162 landscape from the reference state). Technically, the logic of the legacy spin-up is implemented  
163 as a JavaScript library. The library is used by application specific JavaScript code (e.g., the  
164 historic management regime for the given landscape, or the calculation of similarity indices  
165 based on available data) that is provided by the user.

166 One big advantage of the legacy spin-up procedure is that it can accommodate varying degrees  
167 of data availability. If, for instance, only information on stand ages are available, age is the sole  
168 criterion used to determine the reference state. However, in many cases there is also information  
169 on species composition, growing stock, etc. available (as was the case in the historical data from  
170 the 1905 inventory of the landscape studied here), which can be jointly assimilated into the  
171 spin-up procedure. If density or growing stock is available in addition to age and species, for  
172 instance, the legacies of past non-stand-replacing disturbances and management operations  
173 such as thinnings can be captured more faithfully in the spin-up. However, even if no  
174 information on the reference vegetation state is available, the procedure can be used to generate  
175 a first estimate of landscape-scale vegetation structure and composition based on simulations  
176 of historic management and disturbance regimes. The legacy spin-up thus aims to combine the  
177 advantages of a conventional spin-up (model-internal consistency of the initialized ecosystem  
178 states) with the assimilation of available data on the study system for initializing the model.

179

### 180 *Application of the legacy spin-up in the current analysis*

181 For the current study, our aim was to initialize the historic landscape based on stand-level forest  
182 management and planning data for 1905, extracted from historical archives. The available  
183 information on reference states from archival sources was species composition and age classes  
184 per stand, as well as stand-level growing stock. Consequently we defined reference states as the  
185 species-specific growing stock and age for every stand, also accounting the possibility of  
186 multiple age classes within a stand (representing multilayer and multicohort stands). We  
187 developed species and site specific a priori STPs (planting, tending, thinning and harvesting  
188 activities) based on common forest management practice in Austria during the 19<sup>th</sup> century  
189 (Stifter 1994). Initially, the share of species in plantings was assumed equal to the reference  
190 state for each stand. If the Bray-Curties Index, a measure for the similarity of the simulated

191 species composition to the reference state, was above a user-defined threshold at the end of a  
192 simulation period, ABE autonomously adapted planting activities, aiming for a species  
193 composition closer to the reference state. Shade-intolerant species were planted in groups, while  
194 shade-tolerant species were planted in equal spacing in order to improve the competitiveness  
195 of shade-intolerant species, and increase the spatial realism of the emerging species distribution  
196 patterns. Tending and thinning were specified by the stand age at which these activities are  
197 conducted, the amount of timber removed in each intervention, the minimum dbh (diameter at  
198 breast height) for tree removal, and the relative share of trees to be removed per dbh class (e.g.,  
199 in order to differentiate between thinnings from below and from above). The simulation period  
200 was defined by the reference stand age. A combined index including the Bray-Curtis-Similarity  
201 Index (for tree species composition) and the relative deviation from the reference growing stock  
202 level were used to determine the best approximation of the simulated vegetation to the  
203 reference. For an initial estimate of belowground carbon pools in year 0 of the spin-up, we used  
204 data of Kalkalpen National Park (KANP) as derived by Thom and others (2017) for the year  
205 1999. Only simulated states > year 100 of the legacy spin-up were considered for initialization,  
206 in order allow belowground carbon pools to adjust to historical management.

207 We started the legacy spin-up procedure from bare ground, assuming the reduced nitrogen pools  
208 described in the section “Landscape initialization and drivers“ (as a result of historic  
209 management such as litter raking). We ran the legacy spin-up for 1000 years, assuming constant  
210 historic climate conditions. In total 2079 stands were simulated in the legacy spin-up, and  
211 subsequently reassembled to the landscape representing the state of forest vegetation in 1905.  
212 Our evaluations of the spin-up procedure indicated a good match between reference conditions  
213 determined from archival sources and simulation for tree species composition (Fig. S6) and  
214 growing stock (Fig. S7) on the landscape.

215

216 **References**

- 217 Rammer W, Seidl R. 2015. Coupling human and natural systems: Simulating adaptive  
218 management agents in dynamically changing forest landscapes. *Glob Environ Chang*  
219 35:475–85.
- 220 Stifter, A. 1994. Österreichs Wald – Vom Urwald zur Waldwirtschaft. Österreichischer  
221 Forstverein, Wien, Austria, pp 1 – 544.
- 222 Temperli C, Zell J, Bugmann H, Elkin C. 2013. Sensitivity of ecosystem goods and services  
223 projections of a forest landscape model to initialization data. *Landsc Ecol* 28:1337–52.
- 224 Thom D, Rammer W, Dirnböck T, Müller J, Kobler J, Katzensteiner K, Helm N, Seidl R. 2017.  
225 The impacts of climate change and disturbance on spatio-temporal trajectories of  
226 biodiversity in a temperate forest landscape. *J Appl Ecol* 54:28–38.
- 227 Thornton P, Rosenbloom NA. 2005. Ecosystem model spin-up: Estimating steady state  
228 conditions in a coupled terrestrial carbon and nitrogen cycle mode. *Ecol Modell* 189:25–  
229 48.
- 230

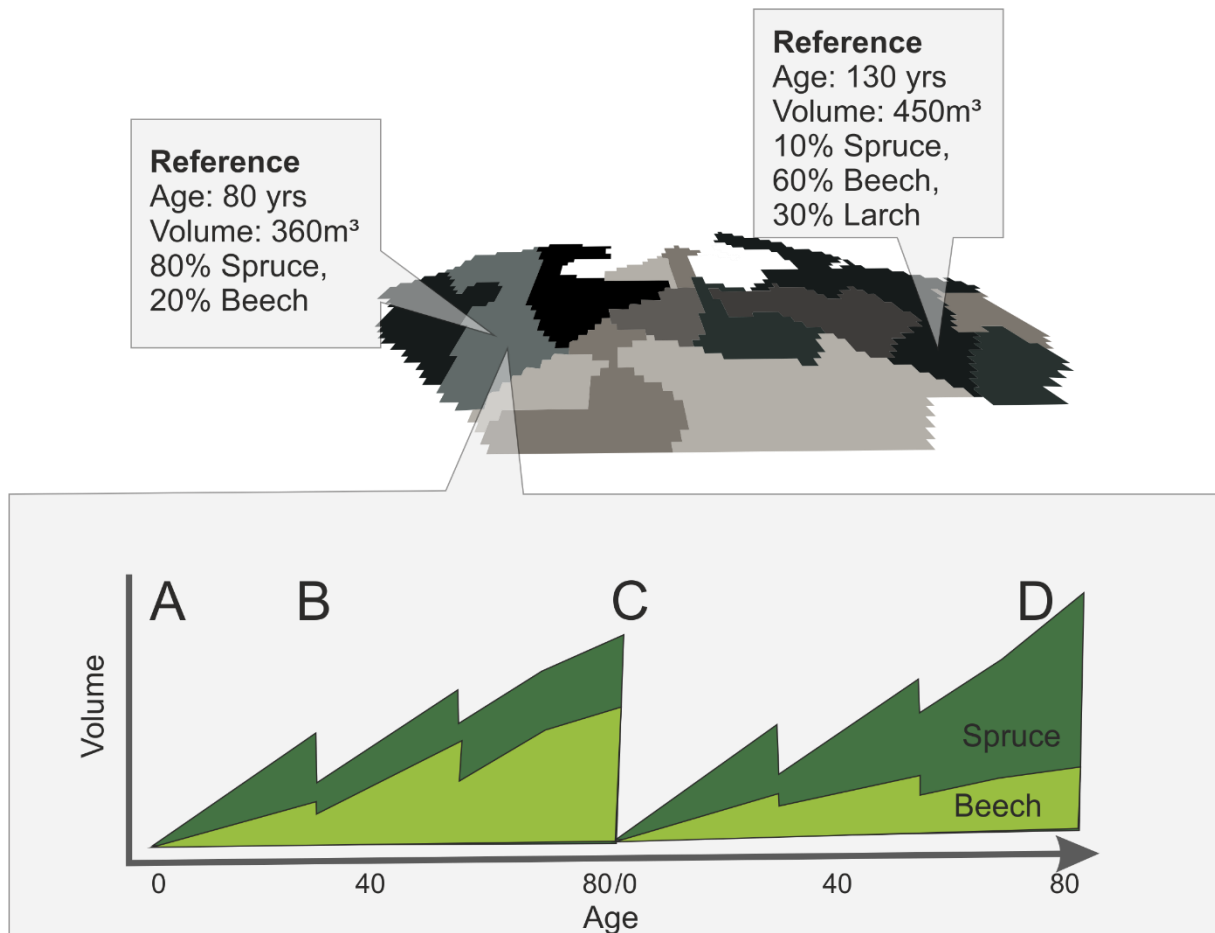

231

232 Fig. S5: Concept of the legacy spin-up. Upper panel: a fictitious landscape with differing  
 233 reference states for the spin-up. Lower panel: The development of one stand over two simulated  
 234 rotations over the course of the legacy spin-up. Letters A to D indicate different phases of the  
 235 process (see text for details).

236

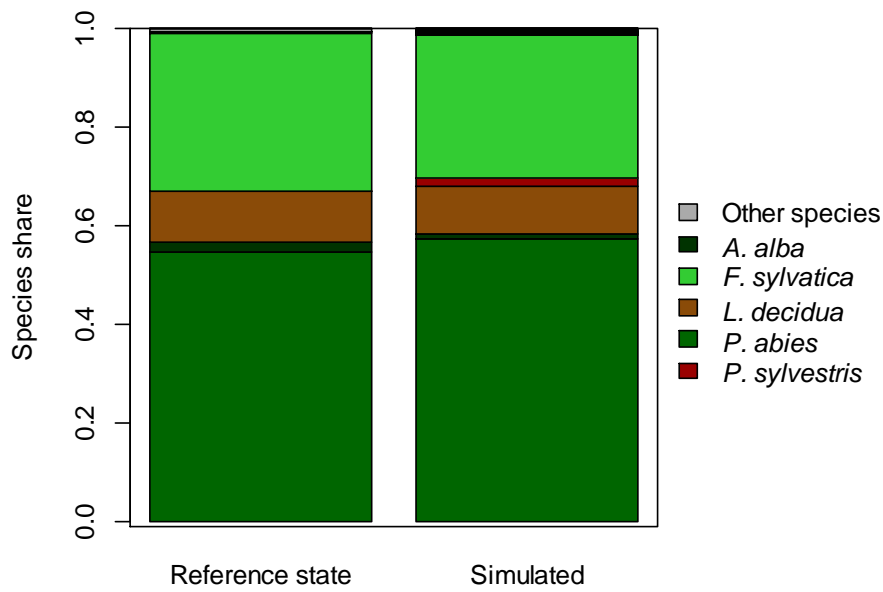

237

238 Fig. S6: Reference state (from archival sources) and simulated tree species composition  
 239 emerging as the end point of a legacy spin-up for the year 1905. Species share refers to the  
 240 relative growing stock per species (1 = 100%).

241

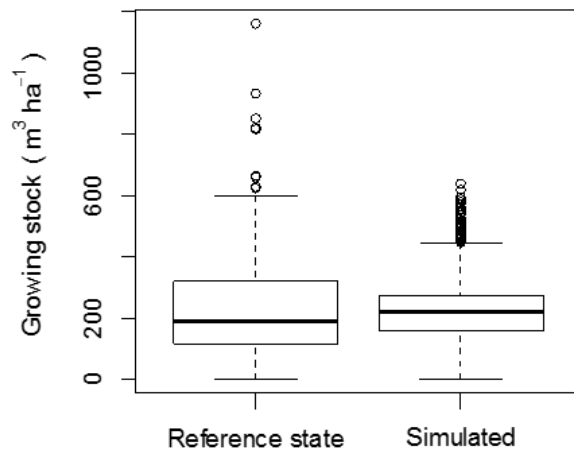

242

243 Fig. S7: Reference state (from archival sources) and simulated growing stock emerging as end  
244 point of a legacy spin-up for the year 1905. Each observation refers to a stand polygon (n=  
245 2079). Mean values: Reference state 216.9 m³ ha<sup>-1</sup> and simulated 207.0 m³ ha<sup>-1</sup>.

246



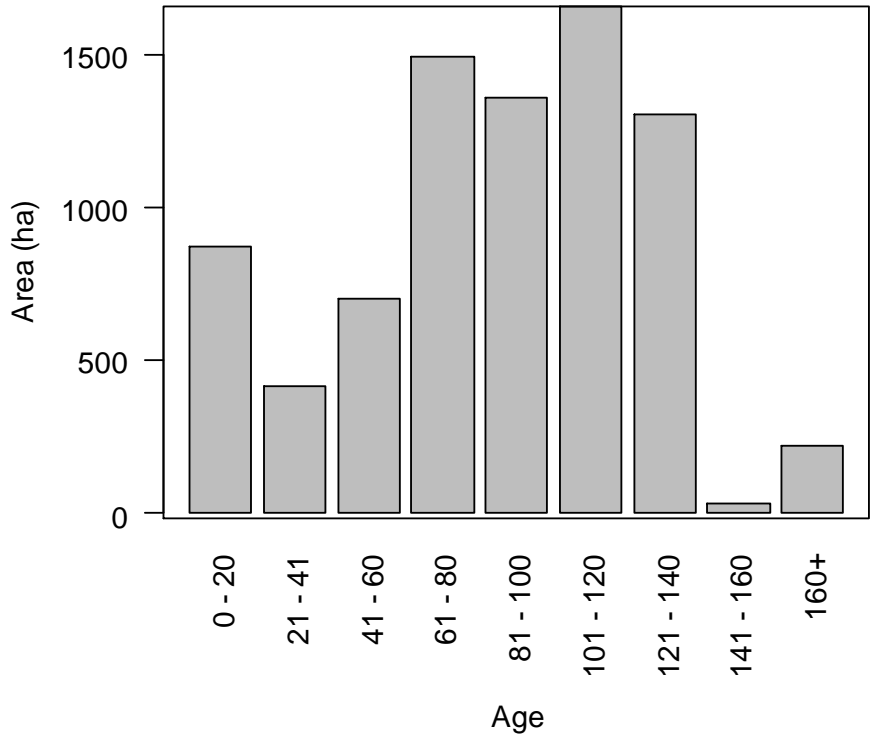

247

248 Fig. S8: Age distribution across the study landscape in 1905.

249

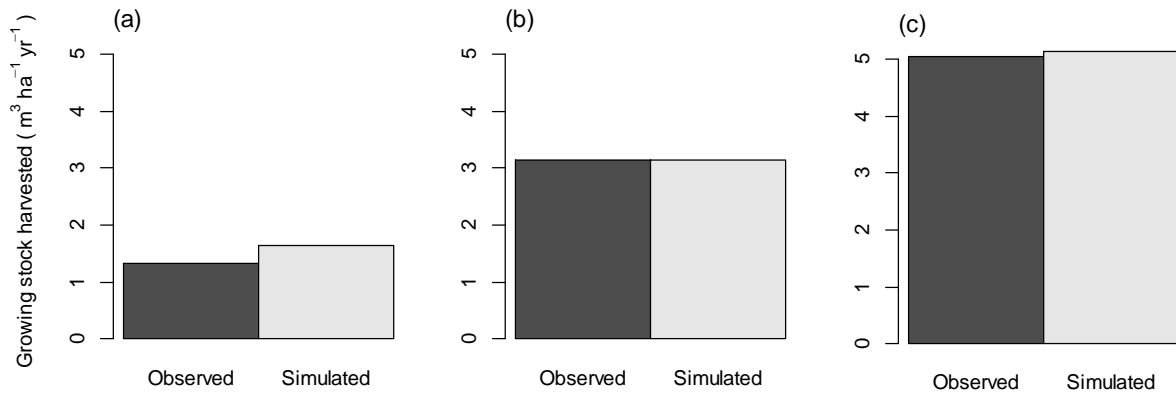

250

251

252 Fig. S9: Growing stock harvested in the periods (a) 1924 – 1952, (b) 1956 – 1973, and (c) 1974  
 253 – 1983, as reconstructed from archival sources (observed) and simulated with iLand. Simulation  
 254 data are for the baseline scenario, i.e. assuming historic natural disturbances and management  
 255 regimes.

256

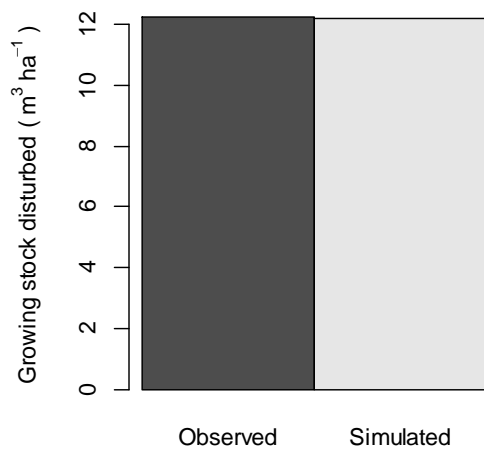

257

258 Fig. S10: Observed and simulated growing stock disturbed during the second disturbance  
259 episode (2007 – 2013). Observed values were derived from disturbance inventories of  
260 Kalkalpen National Park, whereas simulated values are for the baseline scenario (i.e., assuming  
261 historic natural disturbances and management regimes.

262

263

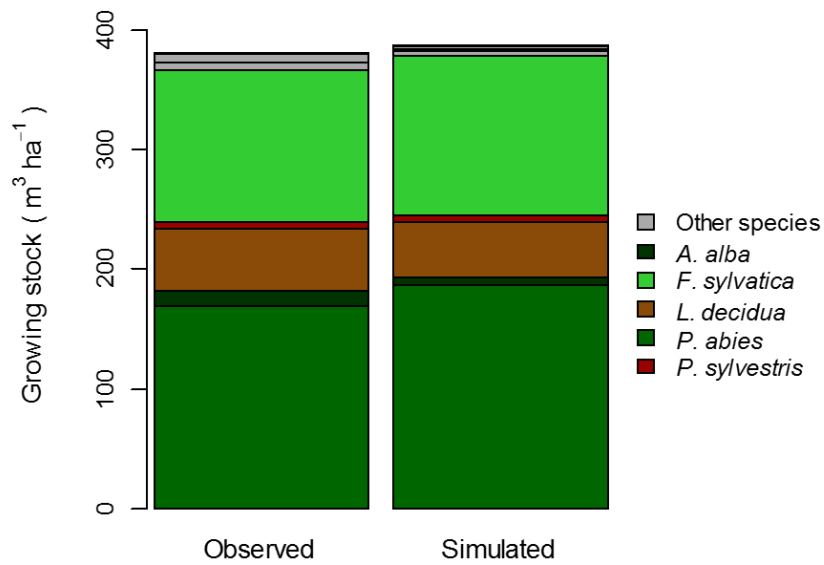

264

265 Fig. S11: Observed and simulated growing stock by tree species in the year 1999. Observations  
 266 are from forest management and planning data from the Austrian Federal Forests, whereas  
 267 simulated data are for the baseline scenario (i.e., assuming historic natural disturbances and  
 268 management regimes).

269

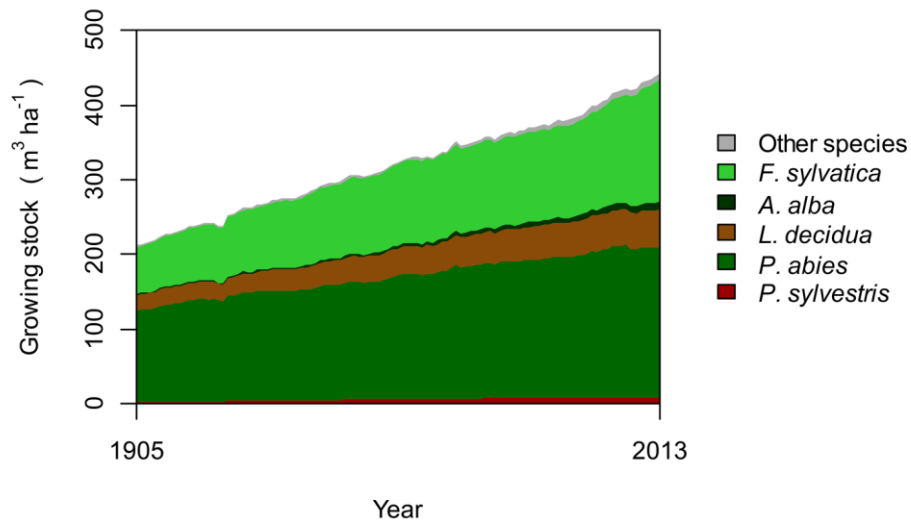

270

271 Figure S12: Growing stock by tree species over time, reconstructed by means of simulation  
 272 modeling. Data are for the baseline scenario (i.e., assuming historic natural disturbances and  
 273 management regimes).

274

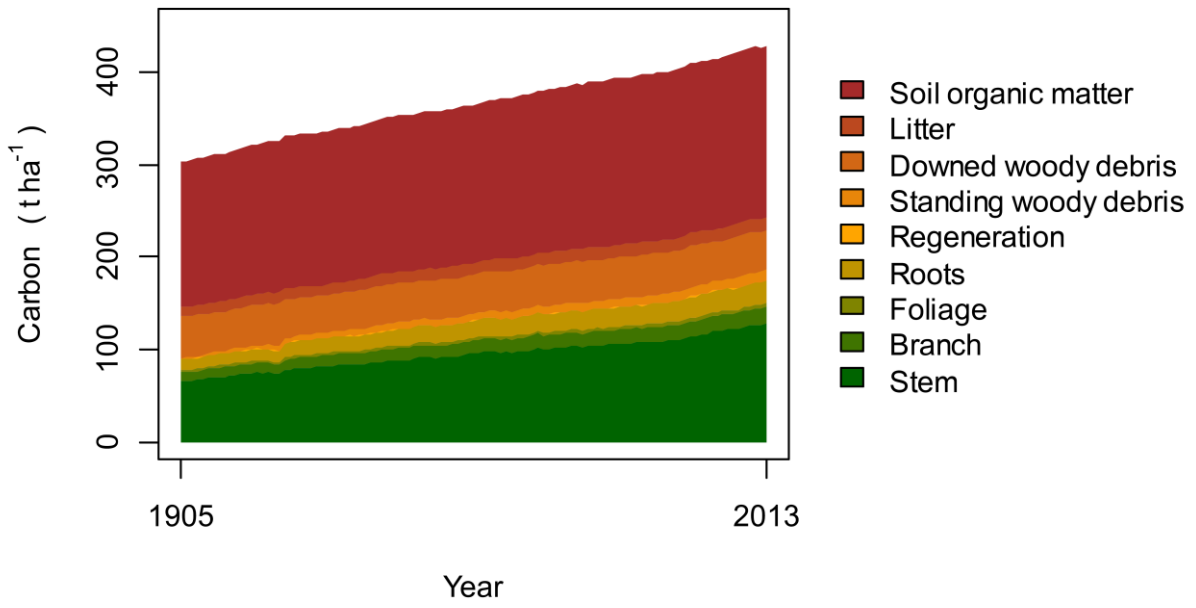

275

276 Figure S13: Carbon storage per compartment, reconstructed by means of simulation modeling.

277 Data are for the baseline scenario (i.e., assuming historic natural disturbances and management

278 regimes).

279

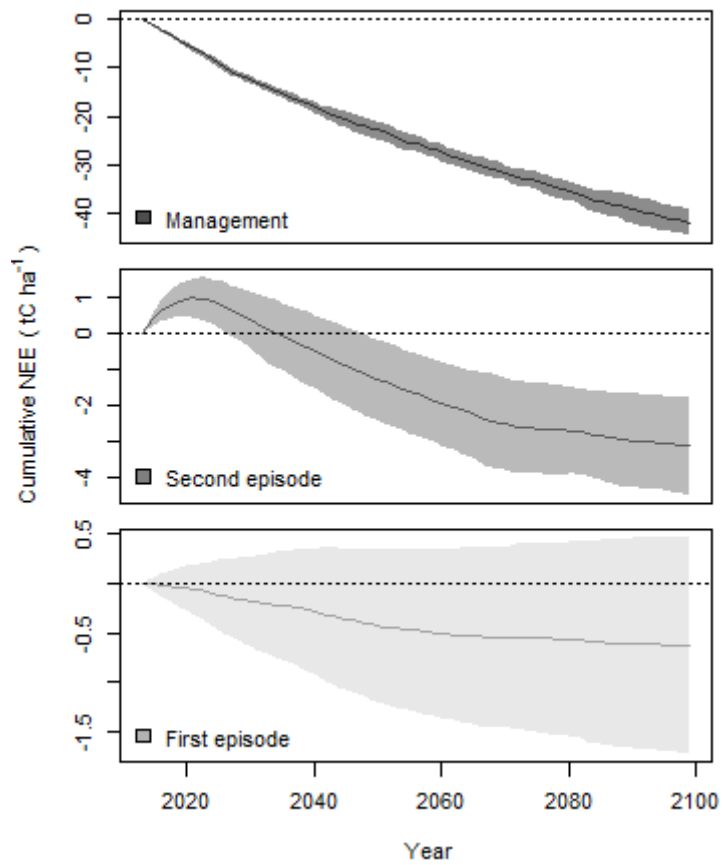

280

281 Fig. S14: Mean cumulative change in NEE induced by disturbance, distinguishing the effects  
 282 of management from that of the first and second episode of natural disturbances. Shaded areas  
 283 denote the standard deviation (SD) in NEE over the respective scenarios. Please note that panels  
 284 are scaled individually.

285
